# Supplementary material for: How attention simplifies mental representations for planning
Source: eLife. 2026 Jul 9;14:RP108034. doi: 10.7554/eLife.108034 (PMC13349381; doi:10.7554/eLife.108034)
Supplement: Supplementary file 1. [file elife-108034-supp1.xlsx]

## Sheet: 1a
The lateralized and non-lateralized maze stimuli for experiment three did not differ on nuisance covariates.
	t-statistic		Uncorrected p-value
Optimal no. moves	-0.53		0.65
Distance to goal	0.91		0.38
Distance to start	1.84		0.07
Distance to walls	0.99		0.33
Distance to center	0.77		0.48

## Sheet: 1b
Effect of neighbouring obstacles on awareness of probed item, after regressing the effect of the VGC model.
	Awareness residuals
Predictors	Estimates	CI	p
(Intercept)	0	-0.02 – 0.02	1
Obstacle 1 (closest)	0.26	0.24 – 0.27	<0.001
Obstacle 2	0.27	0.25 – 0.28	<0.001
Obstacle 3	-0.06	-0.08 – -0.05	<0.001
Obstacle 4	-0.07	-0.09 – -0.05	<0.001
Obstacle 5	-0.15	-0.16 – -0.13	<0.001
Obstacle 6 (furthest)	-0.1	-0.12 – -0.08	<0.001
Observations	13342
R2 / R2 adjusted	0.201 / 0.201

## Sheet: 1c
Effect of neighbouring obstacles on awareness of probed item, after regressing the effect of the VGC model for dataset Ho 2.
	Awareness residuals
Predictors	Estimates	CI	p
(Intercept)	0	-0.01 – 0.01	1
Obstacle 1 (closest)	0.32	0.30 – 0.34	<0.001
Obstacle 2	0.24	0.23 – 0.26	<0.001
Obstacle 3	-0.01	-0.03 – 0.01	0.236
Obstacle 4	-0.07	-0.09 – -0.05	<0.001
Obstacle 5	-0.12	-0.13 – -0.10	<0.001
Obstacle 6 (furthest)	-0.12	-0.13 – -0.10	<0.001
Observations	13321
R2 / R2 adjusted	0.242 / 0.241

## Sheet: 1d
Effect of neighbouring obstacles on awareness of probed item, after regressing the effect of the VGC model for dataset dSC 1.
	Awareness residuals
Predictors	Estimates	CI	p
(Intercept)	0	-0.01 – 0.01	1
Obstacle 1 (closest)	0.23	0.22 – 0.24	<0.001
Obstacle 2	0.09	0.07 – 0.10	<0.001
Obstacle 3	-0.08	-0.09 – -0.06	<0.001
Obstacle 4	-0.22	-0.23 – -0.21	<0.001
Obstacle 5 (furthest)	-0.18	-0.20 – -0.17	<0.001
Observations	19140
R2 / R2 adjusted	0.213 / 0.213

## Sheet: 1e
Effect of neighbouring obstacles on awareness of probed item, after regressing the effect of the VGC model.
		Moderation Effect		CI	p	P FDR	Marginal R2 / Conditional R2
dataset Ho	vertical	0.01		0.01 – 0.02	<0.001	<0.001	0.138 / 0.348
	horizontal	0		-0.01 – 0.00	0.478	0.478	0.136 / 0.343
dataset Ho 2	vertical	0.01		0.00 – 0.02	0.001	0.002	0.092 / 0.246
	horizontal	0.01		0.00 – 0.01	0.013	0.017	0.091 / 0.244

## Sheet: 1f
Similarity of task representations across various methodologies of probing construals for mazes 0-11 from Ho et al. 2022.
	Awareness exp.1	Awareness exp.2	Hovered?
Awareness exp. 2	0.95
Hovered?	0.76	0.71
Hover duration	0.65	0.63	0.89

## Sheet: 1g
Similarity of task representations across various methodologies of probing construals for ‘critical’ mazes.
	Awareness	Memory accuracy	Memory confidence	Hovered?
Memory accuracy	0.86
Memory confidence	0.86	0.82
Hovered?	0.83	0.72	0.82
Hover duration	0.76	0.66	0.79	0.89
