# Supplementary material for: How attention simplifies mental representations for planning
Source: eLife. 2026 Jul 9;14:RP108034. doi: 10.7554/eLife.108034 (PMC13349381; doi:10.7554/eLife.108034)
Supplement: Supplementary file 2. [file elife-108034-supp2.xlsx]

## Sheet: 2a
Hierarchical linear regression model predicting the awareness of an obstacle from its neighbours.
	Awareness of probe obstacle
Predictors	Estimates	CI	p
(Intercept)	0	-0.08 – 0.08	0.974
Obstacle 1 (closest)	0.26	0.25 – 0.28	<0.001
Obstacle 2	0.29	0.27 – 0.30	<0.001
Obstacle 3	0	-0.01 – 0.02	0.699
Obstacle 4	-0.03	-0.04 – -0.01	0.001
Obstacle 5	-0.13	-0.15 – -0.12	<0.001
Obstacle 6 (furthest)	-0.13	-0.15 – -0.12	<0.001
Random Effects
σ2	0.58
τ00 SubjectID	0.11
τ00 MazeID	0.01
ICC	0.17
N MazeID	12
N SubjectID	161
Observations	13342
Marginal R2 / Conditional R2	0.245 / 0.371

## Sheet: 2b
Hierarchical linear regression model predicting the awareness of an obstacle from its neighbours for dataset Ho 2.
	Awareness of probe obstacle
Predictors	Estimates	CI	p
(Intercept)	0	-0.05 – 0.05	0.96
Obstacle 1 (closest)	0.34	0.33 – 0.36	<0.001
Obstacle 2	0.29	0.27 – 0.30	<0.001
Obstacle 3	0.04	0.03 – 0.06	<0.001
Obstacle 4	-0.03	-0.05 – -0.02	<0.001
Obstacle 5	-0.09	-0.11 – -0.07	<0.001
Obstacle 6 (furthest)	-0.12	-0.14 – -0.11	<0.001
Random Effects
σ2	0.6
τ00 SubjectID	0.04
τ00 MazeID	0
ICC	0.07
N MazeID	12
N SubjectID	162
Observations	13321
Marginal R2 / Conditional R2	0.312 / 0.362

## Sheet: 2c
Hierarchical linear regression model predicting the awareness of an obstacle from its neighbours for dataset dSC 1.
	Awareness of probe obstacle
Predictors	Estimates	CI	p
(Intercept)	0	-0.14 – 0.14	0.995
Obstacle 1 (closest)	0.19	0.18 – 0.21	<0.001
Obstacle 2	0.01	-0.00 – 0.02	0.115
Obstacle 3	-0.1	-0.11 – -0.08	<0.001
Obstacle 4	-0.26	-0.27 – -0.25	<0.001
Obstacle 5 (furthest)	-0.29	-0.30 – -0.27	<0.001
Random Effects
σ2	0.65
τ00 SubjectID	0.15
τ00 MazeID	0.03
ICC	0.21
N MazeID	24
N SubjectID	35
Observations	19140
Marginal R2 / Conditional R2	0.263 / 0.421

## Sheet: 2d
The degree to which task-relevant information is lateralized moderates the relationship between the VGC model and awareness (dataset Ho 1).
	Awareness
Predictors	Estimates	CI	p
(Intercept)	0.5	0.47 – 0.54	<0.001
VGC model	0.13	0.13 – 0.14	<0.001
Lateralization index (vert)	0.02	-0.01 – 0.04	0.238
VGC model * Lateralization index (vert)	0.01	0.01 – 0.02	<0.001
Random Effects
σ2	0.09
τ00 SubjectID	0.03
τ00 MazeID	0
ICC	0.24
N MazeID	12
N SubjectID	161
Observations	13342
Marginal R2 / Conditional R2	0.138 / 0.348

## Sheet: 2e
The degree to which task-relevant information is lateralized moderates the relationship between the VGC model and awareness (dataset dSC 1).
	Awareness
Predictors	Estimates	CI	p
(Intercept)	0.45	0.41 – 0.48	<0.001
VGC model	0.13	0.12 – 0.13	<0.001
Lateralization index (vert)	0	-0.02 – 0.01	0.602
VGC model * Lateralization index (vert)	0.01	0.01 – 0.02	<0.001
Random Effects
σ2	0.09
τ00 SubjectID	0.01
τ00 MazeID	0
ICC	0.1
N MazeID	24
N SubjectID	35
Observations	19140
Marginal R2 / Conditional R2	0.137 / 0.222

## Sheet: 2f
Robustness of lateralization moderation effect to nuisance covariates (dataset Ho 1).
	Awareness
Predictors	Estimates	CI	p
(Intercept)	0.4	0.26 – 0.55	<0.001
goal distance	0.04	0.03 – 0.05	<0.001
start distance	0.03	0.02 – 0.03	<0.001
wall distance	-0.02	-0.08 – 0.03	0.354
center distance	0.02	-0.01 – 0.05	0.129
VGC model	0.14	0.14 – 0.15	<0.001
Lateralization index (vert)	0.02	-0.01 – 0.04	0.196
VGC model * Lateralization index (vert)	0.01	0.00 – 0.01	0.004
Random Effects
σ2	0.08
τ00 SubjectID	0.03
τ00 MazeID	0
ICC	0.24
N MazeID	12
N SubjectID	161
Observations	13342
Marginal R2 / Conditional R2	0.148 / 0.356

## Sheet: 2g
Robustness of lateralization moderation effect to nuisance covariates (dataset Ho 2).
	Awareness
Predictors	Estimates	CI	p
(Intercept)	0.43	0.27 – 0.59	<0.001
goal distance	0.06	0.05 – 0.07	<0.001
start distance	0.05	0.04 – 0.06	<0.001
wall distance	0.01	-0.05 – 0.07	0.729
center distance	0.01	-0.02 – 0.04	0.427
VGC model	0.13	0.13 – 0.14	<0.001
Lateralization index (vert)	0.01	-0.01 – 0.03	0.32
VGC model * Lateralization index (vert)	0.01	0.00 – 0.01	0.013
Random Effects
σ2	0.1
τ00 SubjectID	0.02
τ00 MazeID	0
ICC	0.17
N MazeID	12
N SubjectID	162
Observations	13321
Marginal R2 / Conditional R2	0.113 / 0.267

## Sheet: 2h
Robustness of lateralization moderation effect to nuisance covariates (dataset dSC 1).
	Awareness
Predictors	Estimates	CI	p
(Intercept)	0.45	0.41 – 0.49	<0.001
goal distance	-0.02	-0.03 – -0.01	<0.001
start distance	0.01	0.00 – 0.02	0.004
wall distance	0.07	0.04 – 0.10	<0.001
center distance	-0.04	-0.07 – -0.01	0.013
VGC model	0.14	0.13 – 0.14	<0.001
Lateralization index (vert)	-0.01	-0.03 – 0.01	0.379
VGC model * Lateralization index (vert)	0.01	0.01 – 0.02	<0.001
Random Effects
σ2	0.09
τ00 SubjectID	0.01
τ00 MazeID	0
ICC	0.1
N MazeID	24
N SubjectID	35
Observations	19140
Marginal R2 / Conditional R2	0.151 / 0.239

## Sheet: 2i
The lateralization moderation effect did not vary by hemifield (dataset dSC 1).
	Awareness
Predictors	Estimates	CI	p
(Intercept)	0.39	0.30 – 0.48	<0.001
VGC model	0.19	0.14 – 0.25	<0.001
Lateralization index	0.07	-0.01 – 0.15	0.1
Task-relevant hemifield (left vs right)	0.01	-0.03 – 0.04	0.766
VGC model *	-0.03	-0.09 – 0.02	0.204
Lateralization index
VGC model * Task-relevant hemifield	-0.02	-0.05 – 0.02	0.264
Lateralization index * Task-relevant hemifield	-0.02	-0.05 – 0.02	0.391
VGC model *	0.01	-0.03 – 0.04	0.738
Lateralization index * Task-relevant hemifield
Random Effects
σ2	0.09
τ00 SubjectID	0.01
τ00 MazeID	0
ICC	0.1
N MazeID	12
N SubjectID	35
Observations	9402
Marginal R2 / Conditional R2	0.152 / 0.234

## Sheet: 2j
Horizontal lateralization moderation regression (dataset Ho 2).
	Awareness
Predictors	Estimates	CI	p
(Intercept)	0.43	0.28 – 0.59	<0.001
goal distance	0.06	0.05 – 0.07	<0.001
start distance	0.05	0.04 – 0.06	<0.001
wall distance	0.01	-0.05 – 0.07	0.714
center distance	0.01	-0.02 – 0.04	0.462
VGC model	0.13	0.13 – 0.14	<0.001
Lateralization index (horz)	-0.01	-0.03 – 0.01	0.205
VGC model * Lateralization index (horz)	0	-0.00 – 0.01	0.686
Random Effects
σ2	0.1
τ00 SubjectID	0.02
τ00 MazeID	0
ICC	0.17
N grid	12
N SubjectID	162
Observations	13321
Marginal R2 / Conditional R2	0.111 / 0.265

[truncated: 2 more sheets: 2k, 2l]
